# Supplementary material for: Encapsulation Capacity of β-Cyclodextrin Stabilized Silver Nanoparticles towards Creatinine Enhances the Colorimetric Sensing of Hydrogen Peroxide in Urine
Source: Nanomaterials (Basel). 2021 Jul 24;11(8):1897. doi: 10.3390/nano11081897 (PMC8399024; doi:10.3390/nano11081897)
Supplement: Supplementary file 1 [file nanomaterials-11-01897-s001.zip › nanomaterials-1275736-supplementary.pdf]

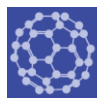

## Article

# Encapsulation Capacity of $\beta$ -Cyclodextrin Stabilized Silver Nanoparticles towards Creatinine Enhances the Colorimetric Sensing of Hydrogen Peroxide in Urine

Abdelaziz Elgamouz <sup>1,\*</sup>, Chahlaa Nassab <sup>1</sup>, Alaa Bihi <sup>1</sup>, Somaya A. I. Mohamad <sup>1</sup>, Aisha H. S. A. Almusafri <sup>1</sup>, Salman S. Alharthi <sup>2</sup>, Sarah A. E. Abdulla <sup>3</sup> and Shashikant P. Patole <sup>4</sup>

<sup>1</sup> Department of Chemistry, College of Sciences, University of Sharjah, Sharjah P.O. Box 27272, United Arab Emirates; U19103696@sharjah.ac.ae (C.N.); abih@sharjah.ac.ae (A.B.); u00041765@sharjah.ac.ae (S.A.I.M.); u00042707@sharjah.ac.ae (A.H.S.A.A.)

<sup>2</sup> Department of Chemistry, College of Science, Taif University, P.O. Box 11099, Taif 21944, Saudi Arabia; s.a.alharthi@tu.edu.sa

<sup>3</sup> Mohamed Bin Zayed University for Humanities, Al Muroor Street, Signal 23, Abu Dhabi, United Arab Emirates; sarah.abdulla@mbzu.ac.ae

<sup>4</sup> Department of Physics, Khalifa University of Science and Technology, Abu Dhabi P.O. Box 127788, United Arab Emirates; shashikant.patole@ku.ac.ae

\* Correspondence: aelgamouz@sharjah.ac.ae; Tel.: +971-65166769

**Citation:** Elgamouz, A.; Nassab, C.; Bihi, A.; Somaya A. I. Mohamad; Aisha H. S. A. Almusafri; Alharthi, S.S.; Sarah A. E. Abdulla; Patole, S.P. Encapsulation Capacity of  $\beta$ -Cyclodextrin Stabilized Silver Nanoparticles towards Creatinine Enhances the Colorimetric Sensing of Hydrogen Peroxide in Urine. *Nanomaterials* **2021**, *11*, 1897. <https://doi.org/10.3390/nano11081897>

Academic Editors: Noel Rodriguez, Diego P. Morales and Almudena Rivad-eneyra

Received: 10 June 2021

Accepted: 20 July 2021

Published: 24 July 2021

**Publisher's Note:** MDPI stays neutral with regard to jurisdictional claims in published maps and institutional affiliations.

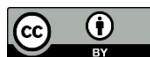

**Copyright:** © 2021 by the authors. Submitted for possible open access publication under the terms and conditions of the Creative Commons Attribution (CC BY) license (<http://creativecommons.org/licenses/by/4.0/>).

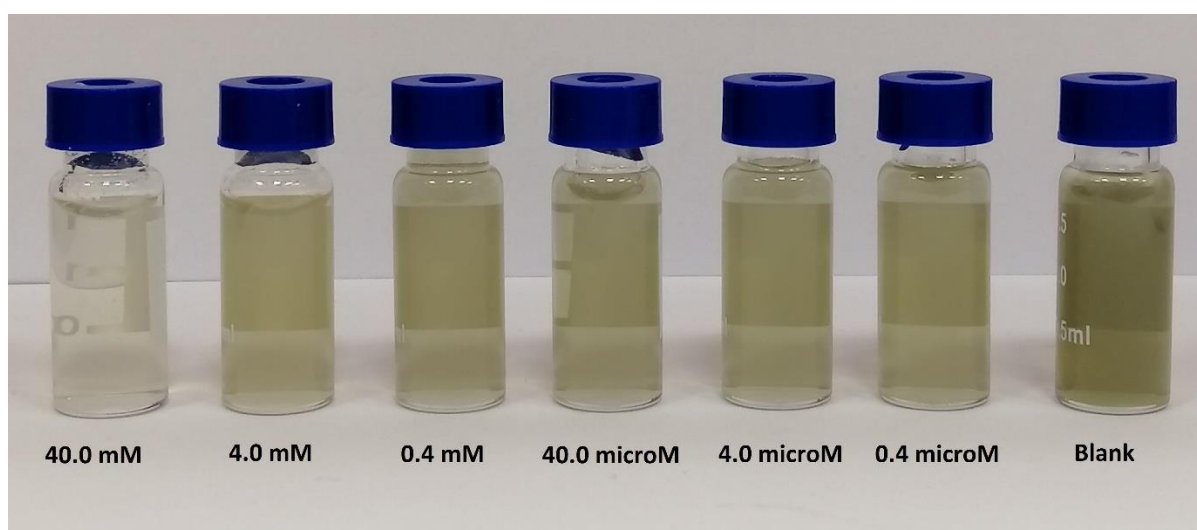

**Figure S1.** Photographs of  $\beta$ -CD-AgNPs exposed to increasing concentrations of  $\text{H}_2\text{O}_2$  from the right to the left.

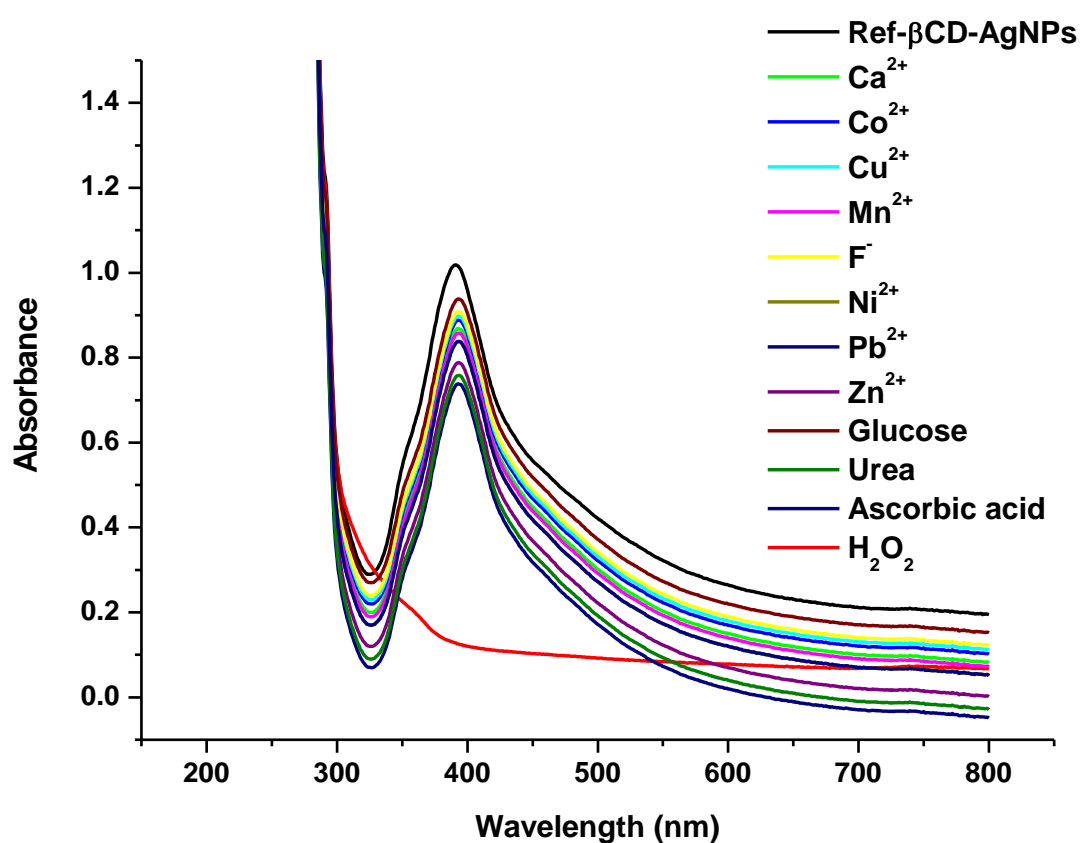

**Figure S2.** LSPR absorbances of Algae-AgNPs reacted with potential interferent equilibrium time = 3.0 min;  $\text{pH}_0 = 7.0$ ,  $T = 25^\circ\text{C}$ .

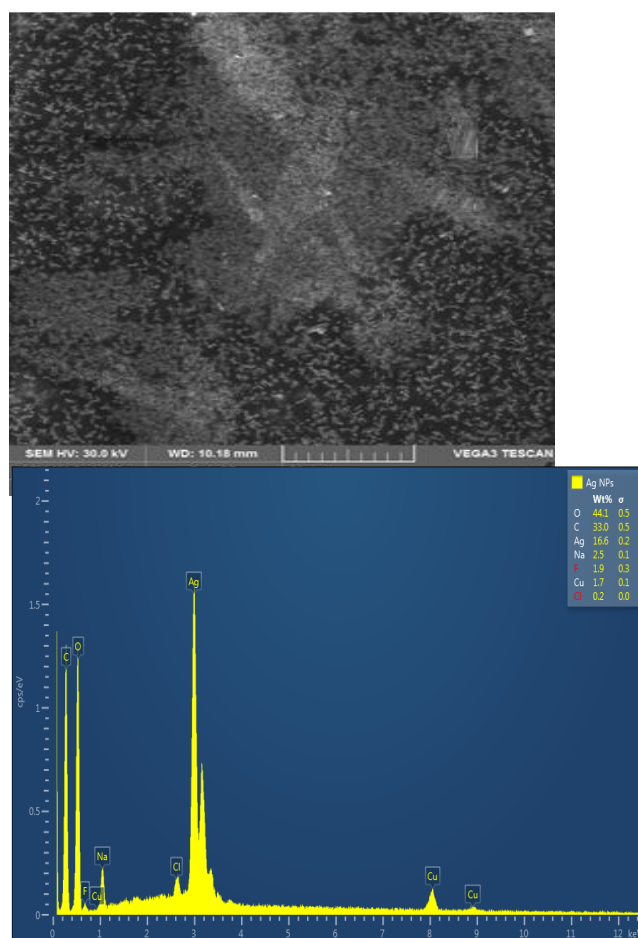

**Figure S3.** (a) Scanning Electron microscopy (SEM) and (b) Energy Disperse Spectroscopy (EDS) of  $\beta$ CD-AgNPs.

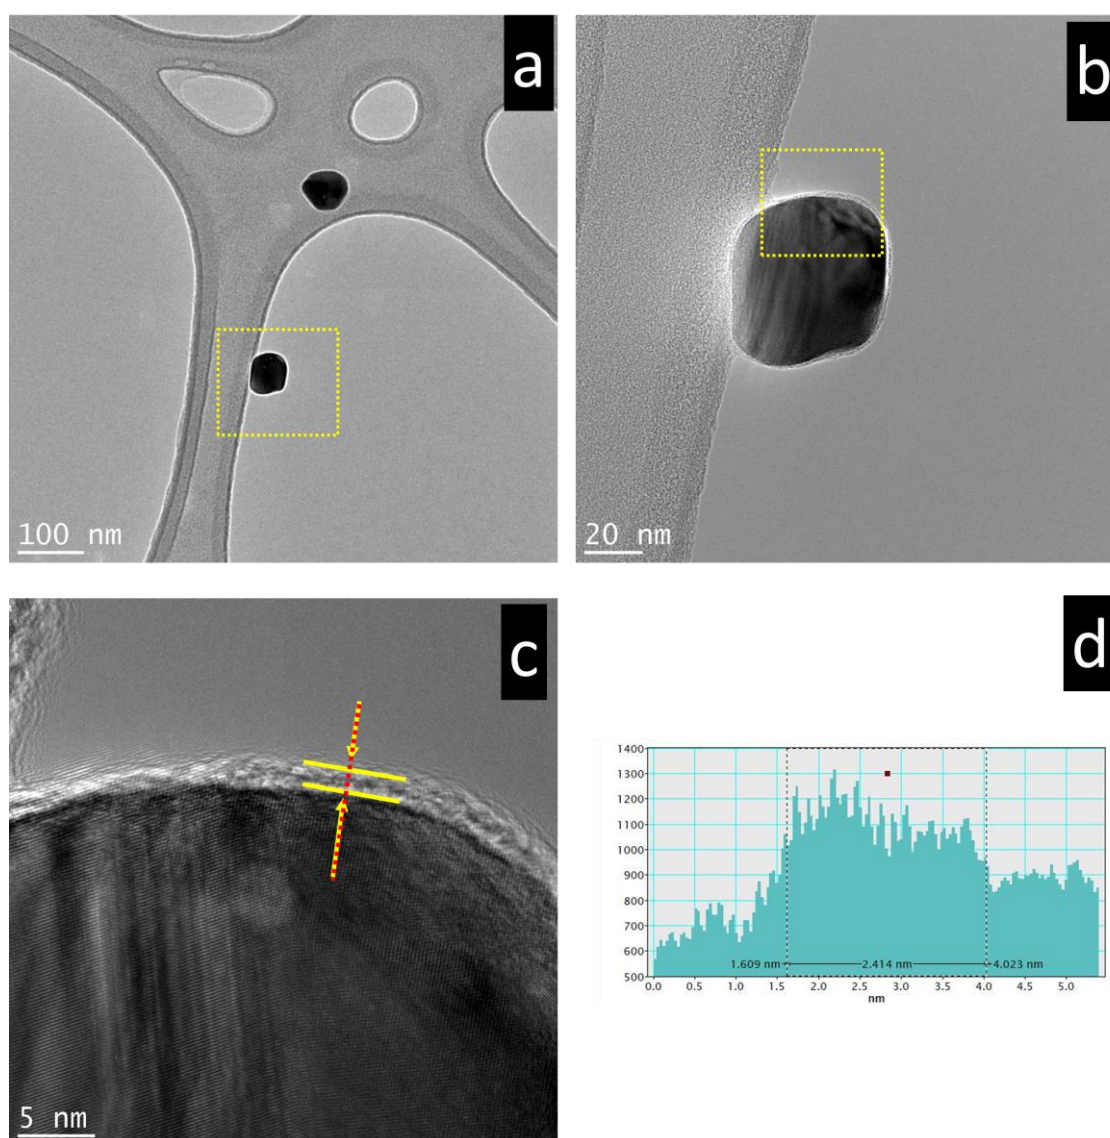

**Figure S4.** (a–b) TEM micrograph of a typical  $\beta$ CD-AgNPs. The dotted rectangle indicates the region of interest (ROI) used for the analysis. (c) A 2.4 nm  $\beta$ CD macromolecule coating is indicated by the lines and arrows in the figure. The intensity profile along the dotted line in (c) is shown in (d), indicating 2.4 nm thickness. The ROI and profile were realized using the Gatan digital micrograph platform.

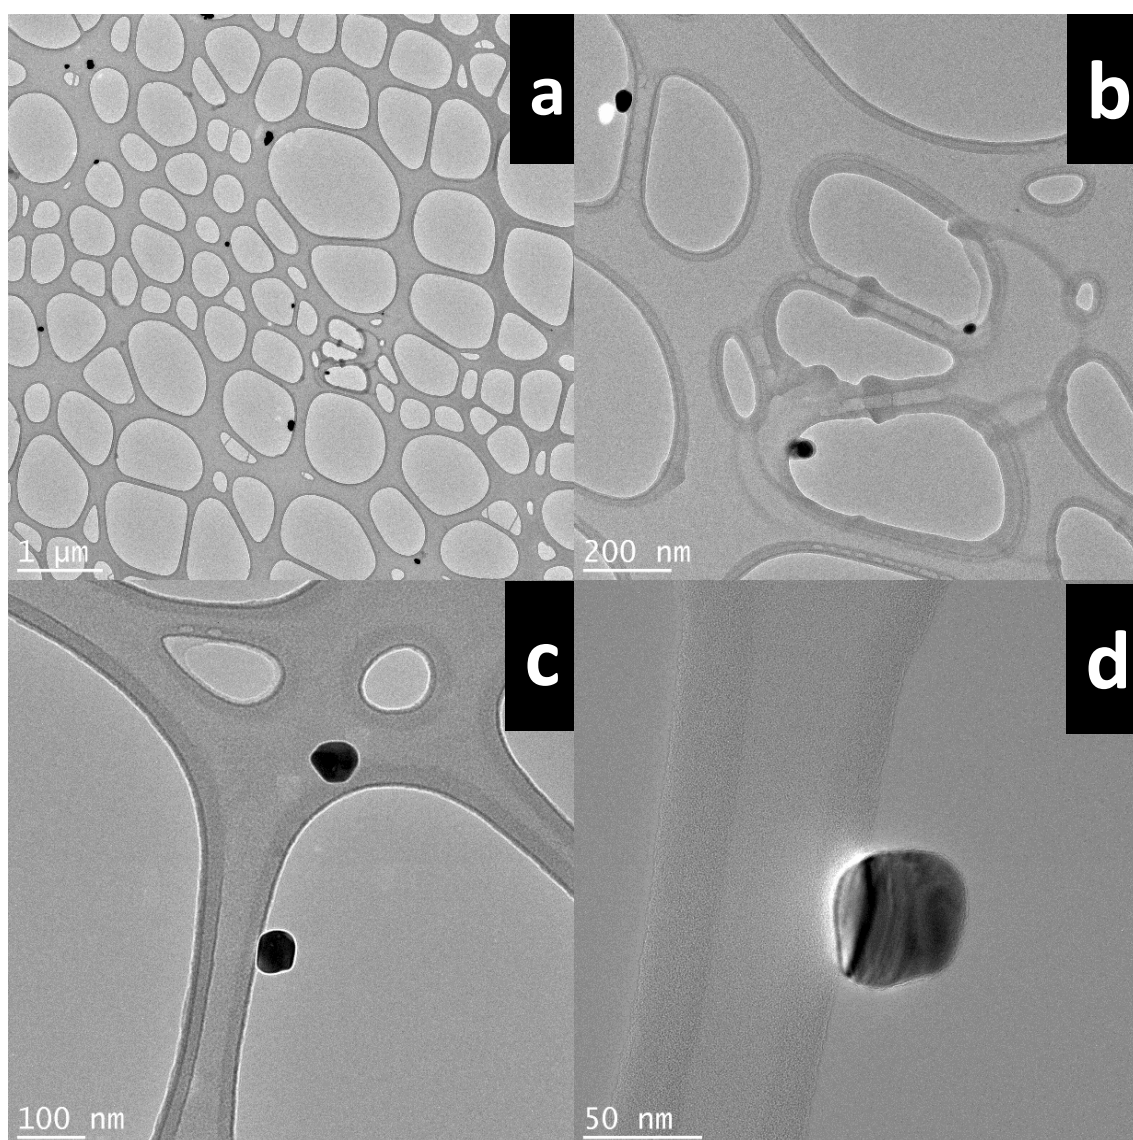

**Figure S5.** TEM micrograph of  $\beta$ CD-AgNPs, with (a) 1.0  $\mu$ m, (b) 200 nm, (c) 100 nm, and (d) 50 nm size scale bars taken at different magnification.
